# Supplementary material for: A high-frequency QCM biosensing platform for label-free detection of the SARS-CoV-2 spike receptor-binding domain: an aptasensor and an immunosensor
Source: Royal Society of Chemistry journal article supplement (doi:10.1039/d3an00008g), 2023-01-01
Supplement: d3an00008g1.pdf [file d3an00008g1.pdf]

## Electronic Supplementary Information

# High-frequency QCM Biosensing Platform for Label-free Detection of SARS-CoV-2 Spike Receptor-Binding Domain: Aptasensor and Immunosensor

Qingqing Zhang<sup>a,‡</sup>, Shuping Liu<sup>b,‡</sup>, Xiaohua Zhang<sup>a</sup>, Cuicui Du<sup>a</sup>, Shihui Si<sup>b,\*</sup> and Jinhua Chen<sup>a,\*</sup>

<sup>a</sup> *State Key Laboratory of Chemo/Biosensing and Chemometrics, College of Chemistry and Chemical Engineering, Hunan University, Changsha, 410082, P. R. China.*

<sup>b</sup> *College of Chemistry and Chemical Engineering, Central South University, Changsha, 410083, P. R. China.*

### List of Contents:

#### 1. Materials and reagents

#### 2. Apparatus

#### 3. HF-QCM Assay of RBD

#### 4. Recovery assay of RBD in the human serum and saliva samples

#### 5. Reference

---

\* Corresponding author. Tel.: +86-731-88821848

E-mail address: chenjinhua@hnu.edu.cn; sishihui@163.com

‡ These authors contributed equally to this work.

## 1. Materials and reagents

The SARS-CoV-2 spike RBD recombinant protein (RBD), antibody of RBD and Influenza A H1N1 hemagglutinin protein (HA) were purchased from Sino Biological Co., Ltd (Beijing, China). The aptamer of RBD (5'-NH<sub>2</sub>-(A)<sub>15</sub>CAGCACCGACCTTGTGCTTTGGGAGTGCTGGTCCAAGGGCGTTAATG GACA-3'), vascular endothelial growth factor 165 (VEGF165), prostate specific antigen (PSA) and mucin 1 (MUC1) were obtained from Shanghai Sangon Biotech Co., Ltd. (Shanghai, China). Bovine serum albumin (BSA) was bought from Sigma-Aldrich (USA). Sodium phosphate monobasic dihydrate (NaH<sub>2</sub>PO<sub>4</sub>·2H<sub>2</sub>O), sodium phosphate dibasic dodecahydrate (Na<sub>2</sub>HPO<sub>4</sub>·12H<sub>2</sub>O), potassium chloride (KCl), potassium ferrocyanide ([K<sub>4</sub>Fe(CN)<sub>6</sub>]), potassium ferricyanide ([K<sub>3</sub>Fe(CN)<sub>6</sub>]) and ethanol were purchased from Sinopharm Chemical Reagent Co., Ltd. (China). Healthy human serum was obtained from Xiangya Hospital of Central South University (China). Healthy saliva was collected from nonirritating whole saliva from subjects who were forbidden to eat or drink for 2 h. Ultrapure water used in all experiments was obtained on a purification system from Wuhan Ulupure Pure Water Equipment Co., Ltd. (China).

## 2. Apparatus

The gold-coated quartz crystals (Au chips) (AT-cut, 100 MHz) were purchased from AWSensors (Valencia, Spain) with an active surface area of 0.785 mm<sup>2</sup>. The resonators were fixed to a support of polyether ether ketone (PEEK) with a conical hole to expose the active surface of the gold coating. The high-frequency quartz crystal microbalance measurements were operated on a HF-QCM sensor made by our group (Changsha, China) containing an automated flow-through equipment controlled by syringe pumps for real-time characterization of the frequency response of the sensor through the experiments performed in flow conditions. Here, the HF-QCM sensor was driven by one oscillating Au electrode on the one surface of quartz crystal (the biosensing electrode is the Au electrode on another surface of quartz crystal) and one non-contacted oscillating stainless steel electrode. Phosphate buffer (20 mM, pH 7.4) was used as the carrier solution with a flow rate of 210  $\mu$ L/min. Electrochemical impedance spectroscopy (EIS) measurements were performed on an electrochemical workstation (CHI 660D, China) with a three-electrode system including a modified Au chip as working electrode, a platinum wire as auxiliary electrode and a saturated calomel electrode (SCE) as reference electrode.

### 3. HF-QCM Assay of RBD

Before modification, the Au chips were subjected to UV radiation (395 nm, 10 W) for 15 min with 30  $\mu\text{L}$  30%  $\text{H}_2\text{O}_2$ , and then washed with ultrapure water and ethanol, and dried naturally at room temperature.<sup>1</sup> Subsequently, 10  $\mu\text{L}$  of the aptamer or antibody solution (1  $\mu\text{M}$ ) was dropped onto the Au chip and the Au chip was kept at 4  $^\circ\text{C}$  overnight to make the aptamer or antibody be immobilized on the Au chip via Au-NH<sub>2</sub> bonds. After washing with phosphate buffer (20 mM, pH 7.4) for three times, the Au chip was placed in the QCM flow cell holder and 0.5 wt % BSA solution was injected into the cell with a flow rate of 210  $\mu\text{L}/\text{min}$  for 25 min at room temperature to block the nonspecific binding sites. Then, phosphate buffer (20 mM, pH 7.4) was injected into the cell with the flow rate of 210  $\mu\text{L}/\text{min}$  to wash the Au chip. After that, 2 mL sample containing different concentrations of RBD and phosphate buffer (20 mM, pH 7.4) was injected into the QCM flow cell with a flow rate of 210  $\mu\text{L}/\text{min}$ . Finally, the frequency shift of each sample was recorded real-timely with the HF-QCM instrument.

#### 4. Recovery assay of RBD in the human serum and saliva samples

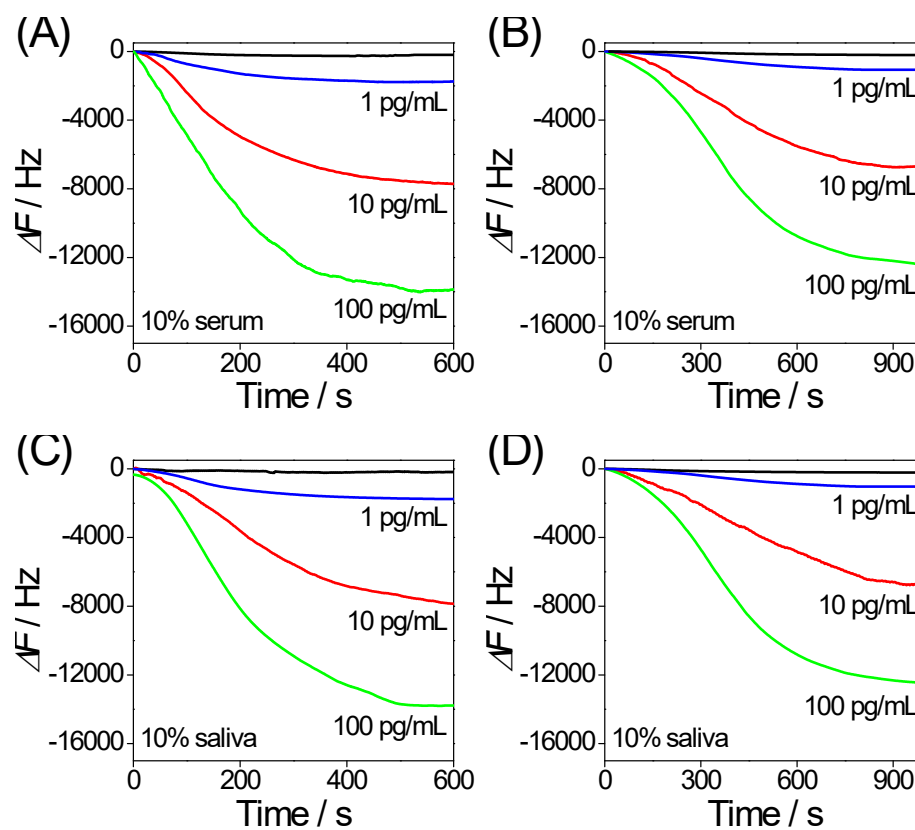

**Figure S1.** Frequency changes of the HF-QCM aptasensor (A and C) and immunosensor (B and D) to different concentrations of RBD (0, 1, 10 and 100 pg/mL) spiked in 10% serum (A and B) and 10% saliva (C and D).

**Table S1.** Recovery assay of RBD in the human serum and saliva samples.

| Sample     | Added<br>(pg/mL) | HF-QCM aptasensor             |                 |            | HF-QCM immunosensor           |                 |            |
|------------|------------------|-------------------------------|-----------------|------------|-------------------------------|-----------------|------------|
|            |                  | Found <sup>#</sup><br>(pg/mL) | Recovery<br>(%) | RSD<br>(%) | Found <sup>#</sup><br>(pg/mL) | Recovery<br>(%) | RSD<br>(%) |
| 10% serum  | 0                | NF                            | NF              | NF         | NF                            | NF              | NF         |
|            | 1                | 1.03                          | 103             | 2.4        | 0.99                          | 99.0            | 4.1        |
|            | 10               | 9.8                           | 98              | 1.3        | 10.1                          | 101             | 3.2        |
|            | 100              | 102                           | 102             | 3.3        | 103                           | 103             | 4.0        |
| 10% saliva | 0                | NF                            | NF              | NF         | NF                            | NF              | NF         |
|            | 1                | 1.02                          | 102             | 1.8        | 0.98                          | 98.0            | 3.9        |
|            | 10               | 10.4                          | 104             | 2.0        | 9.9                           | 99.0            | 4.4        |
|            | 100              | 99                            | 99              | 2.2        | 104                           | 104             | 4.2        |

## 5. Reference

- 1 C. March, J. V. García, Á. Sánchez, A. Arnau, Y. Jiménez, P. García, J. J. Manclús and Á. Montoya, *Biosens. Bioelectron.*, 2015, **65**, 1–8.
